# Supplementary material for: Highly Sustainable Dyes Adsorption in Wastewater Using Textile Filters Fabricated by UV Irradiation
Source: MDPI journal article supplement (doi:10.3390/polym16010015), 2023-12-19
Supplement: s1 [file s1]

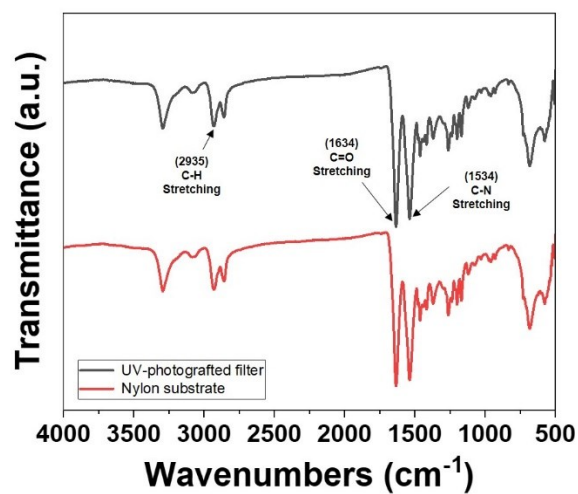

**Figure S1:** FT-IR spectra of the Nylon substrate and UV-photografted filter.

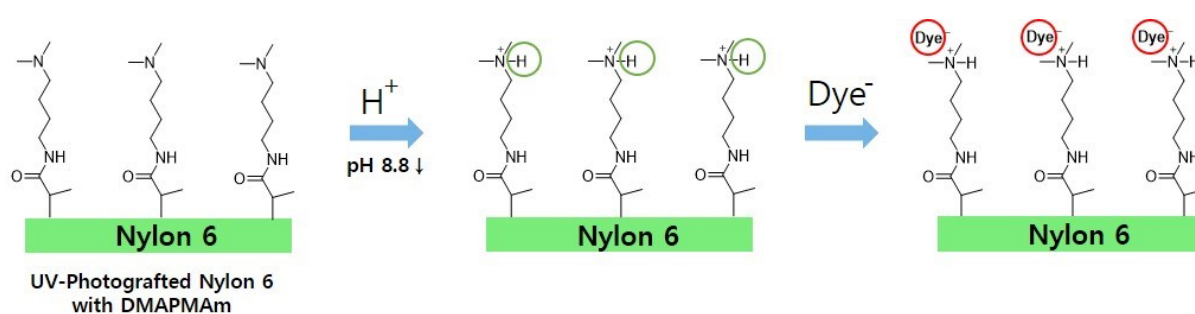

**Figure S2:** UV-photografting of DMAPMam and dye adsorption mechanism.

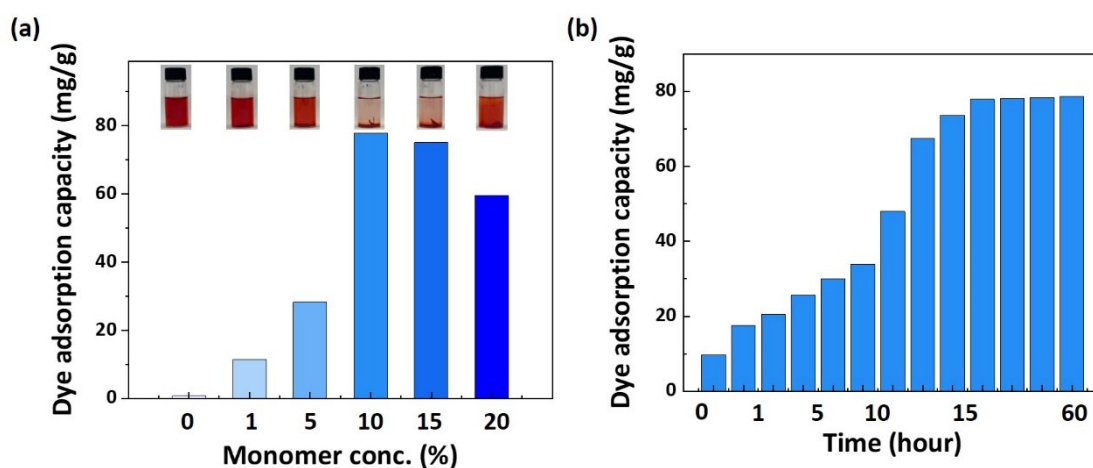

**Figure S3:** Dye adsorption capacity according to (a) concentration of DMAPMam (b) over time.
